# Supplementary material
Source: publisher figshare collection journal article supplement (https://sage.figshare.com/ndownloader/files/15342404)
Supplement: Supplementary file 1 [file 15342404]

**APPENDICIES**

**Table A1**: Type III and sub-variants with different ordering (unanchored)

|  | **III** | | | **IIIa (SC-UA-PD-AD-M)** | | | **IIIb (PD-AD-M-SC-UA)** | | | **IIIc (AD-PD-UA-SC-M)** | | | **IIId (Duration first)** | | |
| --- | --- | --- | --- | --- | --- | --- | --- | --- | --- | --- | --- | --- | --- | --- | --- |
| Parameter | Coef | SE | P | Coef | SE | P | Coef | SE | P | Coef | SE | P | Coef | SE | P |
| M3 x D | **-0.032** | 0.006 | 0.000 | **-0.050** | 0.014 | 0.000 | **-0.028** | 0.013 | 0.024 | **-0.028** | 0.012 | 0.023 | **-0.085** | 0.016 | 0.000 |
| M5 x D | **-0.140** | 0.006 | 0.000 | **-0.117** | 0.014 | 0.000 | **-0.101** | 0.013 | 0.000 | **-0.104** | 0.014 | 0.000 | **-0.235** | 0.017 | 0.000 |
| SC3 x D | **-0.030** | 0.006 | 0.000 | -0.023 | 0.014 | 0.097 | -0.008 | 0.013 | 0.514 | **-0.031** | 0.013 | 0.013 | **-0.071** | 0.016 | 0.000 |
| SC5 x D | **-0.121** | 0.006 | 0.000 | **-0.128** | 0.014 | 0.000 | **-0.110** | 0.013 | 0.000 | **-0.119** | 0.013 | 0.000 | **-0.200** | 0.016 | 0.000 |
| UA3 x D | **-0.036** | 0.006 | 0.000 | **-0.036** | 0.014 | 0.008 | **-0.034** | 0.013 | 0.008 | **-0.042** | 0.012 | 0.001 | **-0.073** | 0.019 | 0.000 |
| UA5 x D | **-0.097** | 0.006 | 0.000 | **-0.104** | 0.014 | 0.000 | **-0.090** | 0.013 | 0.000 | **-0.079** | 0.012 | 0.000 | **-0.145** | 0.016 | 0.000 |
| PD3 x D | **-0.036** | 0.006 | 0.000 | **-0.045** | 0.014 | 0.001 | -0.019 | 0.013 | 0.162 | -0.015 | 0.012 | 0.249 | **-0.052** | 0.018 | 0.000 |
| PD5 x D | **-0.178** | 0.006 | 0.000 | **-0.192** | 0.014 | 0.000 | **-0.172** | 0.013 | 0.000 | **-0.140** | 0.012 | 0.000 | **-0.228** | 0.015 | 0.000 |
| AD3 x D | **-0.041** | 0.006 | 0.000 | **-0.032** | 0.014 | 0.012 | **-0.038** | 0.013 | 0.002 | **-0.032** | 0.013 | 0.006 | **-0.070** | 0.017 | 0.000 |
| AD5 x D | **-0.163** | 0.006 | 0.000 | **-0.179** | 0.014 | 0.000 | **-0.144** | 0.013 | 0.000 | **-0.148** | 0.013 | 0.000 | **-0.209** | 0.016 | 0.000 |
| D | **0.394** | 0.019 | 0.000 | **0.386** | 0.042 | 0.000 | **0.370** | 0.041 | 0.000 | **0.353** | 0.038 | 0.000 | **0.598** | 0.048 | 0.000 |
| No of respondents | 700 |  |  | 150 |  |  | 150 |  |  | 150 |  |  | 150 |  |  |
| No of choices | 7000 |  |  | 1500 |  |  | 1500 |  |  | 1500 |  |  | 1500 |  |  |
| Log Likelihood | -3353 |  |  | -688 |  |  | -734 |  |  | -774 |  |  | -653 |  |  |

Coefficients with p < 0.05 in bold.
